# Supplementary material
Source: PubMed Central journal article supplement (PMC3484942)
Supplement: 10.3163.1536-5050.100.4.006.sg001.pdf [file 10.3163.1536-5050.100.4.006.sg001.pdf]

## **Evidence-based medicine at the intersection of research interests between academic health sciences librarians and medical educators: a review of the literature**

**Josephine L. Dorsch, MALS, AHIP; Gerald J. Perry**

### **APPENDIX**

#### **Evidence-Based Medicine Subset**

1. Aitken EM, Powelson S, Reaume D, Ghali WA. Involving clinical librarians at the point of care: results of a controlled intervention. *Acad Med.* 2011 Dec;86(12):1508–12.
2. Alpi KM, Burnett HA, Bryant SJ, Anderson KM. Connecting knowledge resources to the veterinary electronic health record: opportunities for learning at point of care. *J Vet Med Educ.* 2011 Summer;38(2):110–22.
3. Atlas MC, Smigielski EM, Wulff JL, Coleman MT. Case studies from morning report: librarians' role in helping residents find evidence-based clinical information. *Med Ref Serv Q.* 2003 Fall;22(3):1–14.
4. Babish J. Evidence-based medicine morning report. *J Hosp Lib.* 2003;3(4):35–45.
5. Banks DE, Shi R, Timm DF, Christopher KA, Duggar DC, Comegys M, McLarty J. Decreased hospital length of stay associated with presentation of cases at morning report with librarian support. *J Med Lib Assoc.* 2007 Oct;95(4):381–7. DOI: <http://dx.doi.org/10.3163/1536-5050.95.4.381>.
6. Booth A, Brice A. Increasingly the health information professional's role in supporting evidence-based practice requires familiarity with critical appraisal skills, resources and techniques. *Health Inf Lib J.* 2001 Sep;18(3):175–7.
7. Bradley DR, Rana GK, Lypson ML, Hamstra SJ. A centralized practice-based learning and improvement curriculum for residents and fellows: a collaboration of health sciences librarians and graduate medical education administration. *J Med Lib Assoc.* 2010 Apr;98(2):175–8. DOI: <http://dx.doi.org/10.3163/1536-5050.98.2.013>.
8. Bradley DR, Rana GK, Martin PW, Schumacher RE. Real-time, evidence-based medicine instruction: a randomized controlled trial in a neonatal intensive care unit. *J Med Lib Assoc.* 2002 Apr;90(2):194–201.
9. Brahmi FA, London SK, Emmett TW, Barclay AR, Kaneshiro KN. Teaching life-long learning skills in a fourth-year medical curriculum. *Med Ref Serv Q.* 1999 Summer;18(2):1–11.
10. Bronson Fitzpatrick R. Family practice clerkship information seminars: the role of the health sciences library. *Med Ref Serv Q.* 2004 Winter;23(4):13–24.
11. Burrows S, Moore K, Arriaga J, Paulaitis G, Lemkau HL. Developing an "evidence-based medicine and use of the biomedical literature" component as a longitudinal theme of an outcomes-based medical school curriculum: year 1. *J Med Lib Assoc.* 2003 Jan;91(1):34–41.
12. Burrows SC, Tylman V. Evaluating medical student searches of MEDLINE for evidence-based information: process and application of results. *Bull Med Lib Assoc.* 1999 Oct;87(4):471–6.
13. Chichester SR., Wilder RS, Mann GB, Neal E. Incorporation of evidence-based principles in baccalaureate and nonbaccalaureate degree dental hygiene programs. *J Dental Hygiene.* 2002 Winter;76(1):60–6.

14. Crowley SD, Owens TA, Schardt CM, Wardell SI, Peterson J, Garrison S, Keitz SA. A web-based compendium of clinical questions and medical evidence to educate internal medicine residents. *Acad Med.* 2003 Mar;78(3):270–4.
15. Cullen R, Clark M, Esson R. Evidence-based information-seeking skills of junior doctors entering the workforce: an evaluation of the impact of information literacy training during pre-clinical years. *Health Inf Lib J.* 2011;28(2):119–29.
16. Davidson RA, Duerson M, Romrell L, Pauly R, Watson RT. Evaluating evidence-based medicine skills during a performance-based examination. *Acad Med.* 2004 Mar;79(3):272–5.
17. Dinkelman AL, Viera AR, Bickett-Weddle DA. The role of veterinary medical librarians in teaching information literacy. *J Vet Med Educ.* 2011 Summer;38(2):141–9.
18. Dorsch JL, Jacobson S, Scherrer CS. Teaching EBM teachers: a team approach. *Med Ref Serv Q.* 2003 Summer;22(2):107–14.
19. Dorsch JL, Aiyer MK, Gumidyala K, Meyer LE. Retention of EBM competencies. *Med Ref Serv Q.* 2006 Fall;25(3):45–57.
20. Dorsch JL, Aiyer MK, Meyer LE. Impact of an evidence-based medicine curriculum on medical students' attitudes and skills. *J Med Lib Assoc.* 2004 Oct;92(4):397–406.
21. Dorsch JL, Frasca MA, Wilson ML, Tomsic ML. A multidisciplinary approach to information and critical appraisal instruction. *Bull Med Lib Assoc.* 1990 Jan;78(1):38–44.
22. Dunn K, Wallace EZ, Leipzig RM. A dissemination model for teaching evidence-based medicine. *Acad Med.* 2000 May;75(5):525–6.
23. Earl MF, Neutens JA. Evidence-based medicine training for residents and students at a teaching hospital: the library's role in turning evidence into action. *Bull Med Lib Assoc.* 1999 Apr;87(2):211–4.
24. Finkel ML, Brown HA, Gerber LM, Supino PG. Teaching evidence-based medicine to medical students. *Med Teach.* 2003 Mar;25(2):202–4.
25. Frasca MA, Dorsch JL, Aldag JC, Christiansen RG. A multidisciplinary approach to information management and critical appraisal instruction: a controlled study. *Bull Med Lib Assoc.* 1992 Jan;80(1):23–8.
26. Gardois P, Calabrese R, Colombi N, Deplano A, Lingua C, Longo F, Villanacci MC, Miniero R, Piga A. Effectiveness of bibliographic searches performed by paediatric residents and interns assisted by librarians. a randomised controlled trial. *Health Info Lib J.* 2011 Dec;28(4):273–84.
27. Ghali WA, Saitz R, Eskew AH, Gupta M, Quan H, Hershman WY. Successful teaching in evidence-based medicine. *Med Educ.* 2000 Jan;34(1):18–22.
28. Grandage KK, Slawson DC, Shaughnessy AF. When less is more: a practical approach to searching for evidence-based answers. *J Med Lib Assoc.* 2002 Jul;90(3):298–304.
29. Gruppen LD, Rana GK, Arndt TS. A controlled comparison study of the efficacy of training medical students in evidence-based medicine literature searching skills. *Acad Med.* 2005 Oct;80(10):940–4.
30. Gu XM. Librarians' roles in evidence-based dentistry education: a review of literature and a survey in North America. *Med Ref Serv Q.* 2010 Oct;29(4):331–48.
31. Hicks A, Booth A, Sawers C. Becoming ADEPT (Applying Diagnosis, Etiology, Prognosis, and Therapy Programme): delivering distance learning on evidence-based medicine for librarians. *Health Lib Rev.* 1998 Sep;15(3):175–84.
32. Hill EK, Alpi KM, Auerbach M. Evidence-based practice in health education and promotion: a review and introduction to resources. *Health Promot Pract.* 2010 May;11(3):358–66.

33. Holtum EA. Librarians, clinicians, evidence-based medicine, and the division of labor. *Bull Med Lib Assoc.* 1999 Oct;87(4):404–7.
34. Horsley T, Hyde C, Santesso N, Parkes J, Milne R, Stewart R. Teaching critical appraisal skills in healthcare settings. *Cochrane Database Syst Rev.* 2011 Nov 9;(11):CD001270.
35. Ilic D, Tepper K, Misso M. Teaching evidence based medicine literature searching skills to medical students during the clinical years—a protocol for a randomised controlled trial. *BMC Med Educ.* 2011 Jul 28;11:49.
36. Jacobs SK, Rosenfeld P, Haber J. Information literacy as the foundation for evidence-based practice in graduate nursing education: a curriculum-integrated approach. *J Prof Nurs.* 2003 Sep–Oct;19(5):320–8.
37. Jeffery KM, Maggio L, Blanchard M. Making generic tutorials content specific: recycling evidence-based practice (EBP) tutorials for two disciplines. *Med Ref Serv Q.* 2009 Spring;28(1):1–9.
38. Kaneshiro KN, Emmett TW, London SK, Ralston RK, Richwine MW, Skopelja EN, Brahmī FA, Whipple E. Use of an audience response system in an evidence-based mini-curriculum. *Med Ref Serv Q.* 2008 Fall;27(3):284–301.
39. Kealey S. Continual evolution: the experience over three semesters of a librarian embedded in an online evidence-based medicine course for physician assistant students. *Med Ref Serv Q.* 2011;30(4):411–25.
40. Klem ML, Weiss PM. Evidence-based resources and the role of librarians in developing evidence-based practice curricula. *J Prof Nurs.* 2005 Nov–Dec;21(6):380–7.
41. Koufogiannakis D, Buckingham J, Alibhai A, Rayner D. Impact of librarians in first-year medical and dental student problem-based learning (PBL) groups: a controlled study. *Health Inf Lib J.* 2005 Sep;22(3):189–95.
42. Kronenfeld M, Stephenson PL, Nail-Chiwetalu B, Tweed EM, Sauers EL, McLeod TC, Guo R, Trahan H, Alpi KM, Hill B, Sherwill-Navarro P, Allen MP, Stephenson PL, Hartman LM, Burnham J, Fell D, Kronenfeld M, Pavlick R, MacNaughton EW, Nail-Chiwetalu B, Ratner NB. Review for librarians of evidence-based practice in nursing and the allied health professions in the United States. *J Med Lib Assoc.* 2007 Oct;95(4):394–407. DOI: <http://dx.doi.org/10.3163/1536-5050.95.4.394>.
43. Leipzig RM, Wallace EZ, Smith LG, Sullivant J, Dunn K, McGinn T. Teaching evidence-based medicine: a regional dissemination model. *Teach Learn Med.* 2003 Summer;15(3):204–9.
44. Leon SA, Fontelo P, Green L, Ackerman M, Liu F. Evidence-based medicine among internal medicine residents in a community hospital program using smart phones. *BMC Medical Inform Decis Making.* 2007 Feb 21;7:5.
45. Linton AM, Wilson PH, Gomes A, Abate L, Mintz M. Evaluation of evidence-based medicine search skills in the clinical years. *Med Ref Serv Q.* 2004 Summer;23(2):21–31.
46. Li P, Wu L. Supporting evidence-based medicine: a survey of U.S. medical librarians. *Med Ref Serv Q.* 2011;30:365–81.
47. Lynn VA. Foundations of database searching: integrating evidence-based medicine into the medical curriculum. *Med Ref Serv Q.* 2010 Apr;29(2):121–31.
48. Maden-Jenkins M. Healthcare librarians and the delivery of critical appraisal training: attitudes, level of involvement and support. *Health Inf Lib J.* 2010 Dec;27(4):304–15.
49. Maggio LA, Jeffery KM. Helping a dental school put the “e” in evidence-based dentistry. *J Med Lib Assoc.* 2008 Apr;96(2):152–5. DOI: <http://dx.doi.org/10.3163/1536-5050.96.2.152>.

50. Mayer J, Schardt CM, Ladd R. Collaborating to create an online evidence-based medicine tutorial. *Med Ref Serv Q.* 2001 Summer;20(2):79–82.
51. Michaud GC, McGowan JL, Jagt RH, Dugan AK, Tugwell P. The introduction of evidence-based medicine as a component of daily practice. *Bull Med Lib Assoc.* 1996 Oct;84(4):478–81.
52. Mulvaney SA, Bickman, Giuse NB, Lambert EW, Sathe NA, Jerome RN. A randomized effectiveness trial of a clinical informatics consult service: impact on evidence-based decision-making and knowledge implementation. *J Am Med Inform Assoc.* 2008 Mar–Apr;15(2):203–11.
53. O’Dwyer L, Kerns SC. Evolution of an information literacy curriculum for third-year medical students. *Med Ref Serv Q.* 2011;30(3):221–32.
54. Pappas C. Hospital librarians’ perceptions related to evidence-based health care. *J Med Lib Assoc.* 2008 Jul;96(3):235–8. DOI: <http://dx.doi.org/10.3163/1536-5050.96.3.011>.
55. Parkes J, Hyde C, Deeks J, Milne R. Teaching critical appraisal skills in health care settings. *Cochrane Database Syst Rev* 2001;(3):CD001270.
56. Pearce-Smith N, Hunter J. The introduction of librarian tutors into the Teaching Evidence-Based Medicine week in Oxford, UK. *Health Inf Lib J.* 2005 Jun;22(2):146–9.
57. Perry GJ, Kronenfeld MR. Evidence-based practice: a new paradigm brings new opportunities for health sciences librarians. *Med Ref Serv Q.* 2005 Winter;24(4):1–16.
58. Rana GK, Bradley DR, Hamstra SJ, Ross PT, Schumacher RE, Frohna JG, Haftel HM, Lypson ML. A validated search assessment tool: assessing practice-based learning and improvement in a residency program. *J Med Lib Assoc.* 2011 Jan;99(1):77–81. DOI: <http://dx.doi.org/10.3163/1536-5050.99.1.013>.
59. Ryce A, Dodson S. A partnership in teaching evidence-based medicine to interns at the University of Washington Medical Center. *J Med Lib Assoc.* 2007 Jul;95(3):283–6. DOI: <http://dx.doi.org/10.3163/1536-5050.95.3.283>.
60. Schardt C. Evidence-based medicine and the hospital librarian. *J Hosp Lib.* 2001;1(2):1–14.
61. Schardt C, Adams MB, Owens T, Keitz S, Fontelo P. Utilization of the PICO framework to improve searching PubMed for clinical questions. *BMC Med Inform Decis Making.* 2007;7:16.
62. Scherrer CS, Dorsch JL, Weller AC. An evaluation of a collaborative model for preparing evidence-based medicine teachers. *J Med Lib Assoc.* 2006 Apr; 94(2):159–65.
63. Scherrer C, Dorsch JL. The evolving role of the librarian in evidence-based medicine. *Bull Med Lib Assoc.* 1999 Jul;87(3):322–8.
64. Schilling K, Wiecha J, Polineni D, Khalil S. An interactive web-based curriculum on evidence-based medicine: design and effectiveness. *Family Med.* 2006 Feb;38(2):126–32.
65. Smith M, Killinger LZ, Long C, Henderson C, Marchiori DM, Meeker WC, Smith M. Report on the development, implementation, and evaluation of an evidence-based skills course: a lesson in incremental curricular change. *J Chiropr Educ.* 2004 Fall;18(2):116–26.
66. Vogel EW, Block KR, Wallingford KT. Finding the evidence: teaching medical residents to search MEDLINE. *J Med Lib Assoc.* 2002 Jul;90(3):327–30.
67. Walczak J, Kaleta A, Gabrys E. How are “teaching the teachers” courses in evidence based medicine evaluated? a systematic review. *BMC Med Educ.* 2010;10:64.
68. Wrosh JA, Morgan LK, Sullivant J, Lewis DM. Instruction of evidence-based medicine searching skills during first-year epidemiology. *Med Ref Serv Q.* 1998 Fall;17(3):49–57.
